# 1 Cell twisting during desiccation reveals axial asymmetry in wall organization

2 Sedighe Keynia<sup>1</sup>, Thomas C. Davis<sup>2</sup>, Daniel B. Szymanski<sup>2</sup>, Joseph A. Turner<sup>1\*</sup>

3 <sup>1</sup>Mechanical and Materials Engineering, University of Nebraska-Lincoln, Lincoln, Nebraska, U.S.A.

4 <sup>2</sup>Dept. of Botany and Plant Pathology, Dept. of Biological Sciences, Purdue University, West  
5 Lafayette, Indiana, U.S.A.

## 6 \*Corresponding author:

7 Joseph A. Turner; (402) 472-8856; W342 Nebraska Hall, University of Nebraska-Lincoln, Lincoln,  
8 Nebraska 68588, U.S.A.

9 Email: [jaturner@unl.edu](mailto:jaturner@unl.edu)

## 10 Running head: Cell anisotropy revealed by desiccation

11 **Keywords:** Arabidopsis trichome branch; desiccation; cell twist; mechanical properties;  
12 computational modeling

## 13 Abstract

14 Plant cell size and shape are tuned to their function and specified primarily by cellulose  
15 microfibril (CMF) patterning of the cell wall. *Arabidopsis thaliana* leaf trichomes are responsible for  
16 protecting plants against environmental elements and are unicellular structures that employ a highly  
17 anisotropic cellulose wall to extend and taper, generating pointed branches. During elongation, the  
18 mechanisms by which shifts in fiber orientation generate cells with predictable sizes and shapes are  
19 unknown. Specifically, the axisymmetric growth of trichome branches is often thought result from  
20 axisymmetric CMF patterning. Here, we analyzed the direction and degree of twist of branches after  
21 desiccation to reveal the presence of an asymmetric cell wall organization with a left-hand bias. CMF  
22 organization, quantified using computational modeling, suggests a limited reorientation of microfibrils  
23 during growth and maximum branch length limited by the wall axial stiffness. The model provides a  
24 mechanism for CMF asymmetry, which occurs after the branch bending stiffness becomes low enough  
25 that ambient bending affects the principal stresses. After this stage, the CMF synthesis results in a  
26 constant bending stiffness for longer branches. The resulting natural frequency of branches after a  
27 length of 200  $\mu\text{m}$  falls within the range of the sounds associated with many insects.

## 28 **Statement of significance**

29           The growth of plant cell walls is governed by the direction of cellulose synthesis but the factors  
30 that influence the overall wall anisotropy are only partially understood. The twist of leaf trichome  
31 branches after desiccation reveals a left-handed asymmetry in cell wall organization even though the  
32 geometry is axisymmetric. This surprising behavior provides information about the directionality of  
33 cellulose synthesis control in plant cells.

## 34 **Introduction**

35           The shape and growth pattern of a plant cell are determined by the organization of cellulose  
36 microfibrils (CMFs) (1–4), the major load-bearing components within cell walls, that are needed to  
37 constrain the relatively high (~5-10 atm) hydrostatic turgor pressure. The remaining cell wall volume  
38 consists of a hydrated matrix of pectin, hemicellulose, and structural proteins (5, 6). According to the  
39 cellulose synthase constraint hypothesis (7, 8) cortical microtubules (CMTs) and associated proteins  
40 control the synthesis of CMFs, and CMT orientation has been correlated with cell wall stresses (9, 10).  
41 Thus, tracking of CMTs is often used to reveal information about CMF organization during growth,  
42 and the anisotropic mechanical properties that arise from their orientation.

43           According to the multinet growth hypothesis (11, 12), CMFs realign to the direction of  
44 maximum stress. Unfortunately, it is not possible to measure stress in cell walls directly, so  
45 computational models are needed to match measured load-displacement and/or strain data to infer  
46 mechanical behavior. Then, model stress patterns can be used to reveal relations between CMTs and  
47 CMFs. Such analyses for most plant tissues are complicated by cell-cell interactions because boundary  
48 conditions are challenging to estimate. For this reason, isolated, unicellular structures, such as the leaf  
49 trichomes studied here, provide valuable insight into the role of stress and cell wall heterogeneity for  
50 cell growth (13).

51           The organization of cell wall constituents controls the wall mechanical behavior. In particular,  
52 the orientation distribution of CMFs is critical to the determination of wall strain and the growth  
53 patterns under turgor pressure (6). However, when the turgor pressure is removed, the resulting  
54 deformation can reveal organization information that cannot be determined from the pressurized cell  
55 alone. A similar concept is used in biomedical engineering to study the material behavior of arteries  
56 (14, 15). An artery is a pressurized composite tube composed of smooth muscle cells, elastin, and  
57 collagen, each with different mechanical properties. Growth and remodeling in the loaded state of the  
58 artery produce stresses for the unloaded state. When a single axial cut is made in an unloaded artery,

59 the cross-section opens at a specific angle because of residual stress in the artery wall. We exploit a  
60 similar concept through the removal of turgor pressure by desiccation; once the pressure is removed,  
61 the cell deformation reflects the stress state under pressure. Hence, by using a computational approach  
62 (cell wall deformation after dehydration and stress release) along with the experimental measurements,  
63 concepts about organization, such as the multi-net growth hypothesis, can be investigated.

64 In addition, recent studies of trichome dynamics (16, 17) used FE models to predict the natural  
65 frequencies associated with the different vibration modes. Their results were interpreted with respect  
66 to trichome functionality against herbivore insects and were analyzed relative to the sounds generated  
67 by the insects, but their predicted frequencies were higher than the range from many insects. However,  
68 their FE models were based on an isotropic material with mechanical properties that were constant  
69 during growth. Clearly, more accurate material information would improve the predicted vibration  
70 behavior.

71 In this article, desiccation of leaf trichome branches is used to quantify the cell wall mechanical  
72 properties using a computational model that reproduces the experimental deformations. The model is  
73 then used to understand changes in the axial stiffness, bending stiffness and natural frequencies of the  
74 branch during growth. The stiffnesses define the capacity of the branch to deformation for a specific  
75 loading direction and the natural frequency defines potential interactions against environmental threats.  
76 The results are expected to impact future studies focused on the role of genetics and/or environment on  
77 plant growth and development. Specifically, other important trichoblasts include cotton fibers (18, 19),  
78 for which small advances in modeling efforts could have a dramatic impact on the global textile  
79 industry. Computational approaches, when effectively integrated with advanced biological methods,  
80 may allow new crop varieties to be developed efficiently.

## 81 **Materials and Methods**

### 82 **Microtubule imaging details**

83 Plate grown Col-0 seedlings carrying a transgenic UBQ1p::TUB6-RFP construct were used for imaging  
84 trichomes on the first 5 leaves. Briefly, Z-stacks were taken using a 100X oil objective and a 561 nm  
85 excitation laser on a spinning disc confocal microscope for several overlapping sections of the trichome  
86 (as many necessary to capture the whole trichome branch from base to tip). Images were stitched  
87 together and processed using ImageJ, and microtubule orientation were analyzed from ROIs covering  
88 large portions of the trichomes using the ImageJ plugin OrientationJ.

### 89 **Microtubule angle quantification**

90 Microtubule images were obtained on a spinning disk confocal microscope with a 100X 1.4  
91 NA oil immersion objective, using a 561 nm solid-state laser as previously described (13). 11-13 DAG  
92 seedlings were whole mounted on chambered slides, and young leaves were imaged. An image tiling  
93 and montaging approach were taken to capture the entire cortical surface of a trichome branch. After  
94 brightness and contrast and Gaussian blur smoothing, background subtraction was performed using the  
95 rolling ball method with a 15-pixel radius. Images were sharpened using the unsharp mask function and  
96 oriented horizontally with the apex facing to the right. The ImageJ plugin OrientJ was used to quantify  
97 the dominant angle and coherency of the population of microtubules within each branch. Microtubule  
98 angle distributions were used to score each branch as either longitudinal/mixed, right-handed helical,  
99 or left-handed helical.

#### 100 **Plant materials, growth conditions, trichome stage definition and desiccation**

101 The *Arabidopsis* (*Arabidopsis thaliana*) Columbia and Ler ecotypes were used to observe  
102 trichome behavior under turgor pressure removal. For all experiments, a range of branch lengths from  
103 young trichomes (branch lengths less than 50  $\mu\text{m}$ ), to old trichomes (branch lengths longer than 300  
104  $\mu\text{m}$ ), was examined during desiccation with time-lapse imaging. Seeds were stratified at 4 °C for 2  
105 days and then grown in a growth chamber for 2-22 days under 12 h day length at 24 °C and relative  
106 humidity of 50–60 %. The goal was to study different trichome branches with many different lengths.

107 Complete removal of the turgor pressure was needed to measure the amount of twist with  
108 respect to branch length. The whole plant was kept in soil at room temperature for about one month  
109 without watering (this duration may be different if this protocol were to be executed in a different  
110 facility due to the difference in humidity levels and months of the year). During this time, the plants  
111 were exposed to day and night light conditions in which the plant is naturally grown. Using the slow  
112 desiccation process, the water inside the vacuoles dried out, leading to the collapse and twist of  
113 trichomes. For rapid desiccation, a vacuum was applied for 20 minutes which decreased the pressure  
114 from 1 to  $\sim 0.05$  mbar. Completely twisted samples ( $\sim 220$ ) were selected and prepared for the  
115 observations and measurements. To identify the direction of twist only, removal of a fraction of the  
116 water content in the vacuole was sufficient because the direction of twist was evident even after partial  
117 dehydration. A plastic Petri dish (2 and 3.5 in) was prepared, and the bottom of the plate was covered  
118 with strips of double-sided tape. Each leaf was trimmed from its attachment to the petiole. If the first  
119 and second leaves were the last or the last visible leaves, the whole plant was trimmed from its  
120 attachment to the root to avoid any possible damage to the leaves. The empty spaces between the leaves  
121 were filled with desiccant beads (silica gel desiccants 2-1/4 x 1-1/2 inches) to expedite the moisture

122 removal. If the leaves were not visible by the naked eye and only observable under a 10X microscope,  
123 less than one day (~ 10 hours) was required to remove the turgor pressure and observe the direction of  
124 the twist. Typically, it took more than 10 days for the older and larger leaves or the trichomes farther  
125 away from the petiole to dry out and twist. Finally, after sufficient time (depending on the size of the  
126 leaf and the position of the trichome), the direction of twist was visible using a 20X lens of a laser  
127 scanning confocal microscope. Scanning electron microscopy (SEM) was only useful for this study for  
128 fully developed leaves and trichomes. At those stages of growth, enough space existed between  
129 trichomes for imaging. For small leaves, the SEM vacuum resulted in tangling of trichomes and bending  
130 of the leaf such that high-quality images were challenging to use for twist measurements. The amount  
131 of twist for each range of branch length was measured by selecting a point on one of the edges of the  
132 collapsed trichome branch and moving along the path of the edge and measuring the amount of sweep  
133 angle. For a better understanding, see Figs. S2a and b, which shows the method used to measure the  
134 length and amount of twist, respectively.

### 135 **Finite Element Model**

136 A finite element model of the trichome branch response to desiccation was created using the  
137 commercial finite element software Abaqus 2019. Several factors, including geometry, material  
138 properties, and boundary conditions, play a role in the deformation pattern after turgor pressure  
139 removal. The model parameters were adjusted to match the amount and direction of twist of the  
140 branches at different stages of growth (i.e., length). A more detailed description of the FE model,  
141 including the sensitivity study for mechanical properties and estimates of shear strain, is included  
142 in the Supplementary Information. The trichome branch was modeled as a composite shell in which  
143 the branch diameter at the flank was constant with a radius of 8  $\mu\text{m}$  (13). Because microtubules and  
144 cellulose synthase (CESA) complex have a similar alignment (13), the cell wall was modeled as an  
145 orthotropic laminate composite with single dominant fiber orientation. The range of this orientation  
146 was determined from the amount of twist. A layer of viscoelastic matrix, representative of the pectin in  
147 the wall, defined the time-dependent behavior of the cell wall using values based on pavement cell  
148 viscoelastic properties (20, 21). The matrix modulus and modulus of the orthotropic layer perpendicular  
149 to the cellulose fibers were assumed as 100 MPa (22) while the modulus of the orthotropic layer parallel  
150 to the fibers was assumed as 70 GPa (23–26). Assuming a Poisson's ratio of 0.45 resulted in a shear  
151 modulus in all directions of 45 MPa. The wall matrix was assumed to constitute ~36% of the cell wall  
152 with a density of 1000  $\text{kg}/\text{m}^3$  (27), and the remaining volume was assumed to be occupied by cellulose  
153 (28), with a density of 1650  $\text{kg}/\text{m}^3$  (25) which result in the whole cell wall density to be 1416  $\text{kg}/\text{m}^3$ ,

154 consistent with measurements (29) and an elasticity of  $\sim 45$  GPa in the direction of fibers and  $\sim 100$  MPa  
155 in perpendicular direction in case of fully aligned fibers, which is close to the range represented by  
156 Gibson (30). The trichome branch was modeled as a shell reservoir under constant hydrostatic turgor  
157 pressure with a pressure on the outer wall to represent atmospheric pressure (0.1 MPa). The turgor  
158 pressure in the model was increased from 0 to 0.6 MPa, held constant for  $\sim 20$ s, then was removed with  
159 the same rate as the increasing rate, and the branch was then under atmospheric pressure. For a more  
160 accurate model to represent the large deformation observed after desiccation, a nonlinear analysis  
161 was implemented. Prior to our study, there were no suitable assumptions for the trichome branch  
162 mechanical properties that lead to the same twist after the removal of turgor pressure. Thus, the branch  
163 model was constructed based on the trichome branch shape, and the model properties were iterated to  
164 find the fiber orientation that reproduced the measured behavior.

165

## 166 **Results and Discussion**

### 167 **Trichome Branch Twist Reveals Cell Wall Organization**

168 Trichome branches (*A. thaliana* WT Col-0) were observed using a desiccation assay to quantify  
169 changes in their deformation (Fig. 1). Complete removal of turgor pressure took anywhere from a  
170 couple of hours to  $\sim 30$  days depending upon leaf age and the cell position relative to the petiole. A fast  
171 desiccation treatment ( $\sim 20$  minutes; see Methods and Fig. S2) showed that the twist was not affected  
172 by possible reorientation of CMTs during the dehydration process. The geometry of the branch was  
173 symmetric about its long axis (i.e., axisymmetric) for all lengths (Fig. 1a). However, the observed twist  
174 after desiccation cannot occur unless the wall has an organization which is not axisymmetric. An image  
175 of an extensive collection of trichome branches (Fig. 1b, c) shows the consistency of the behavior after  
176 desiccation. More than 220 trichome branches were studied, and the amount and direction of their twist  
177 were measured as a function of branch length. Interestingly, there was a clear length dependence to the  
178 twisting which occurred only for branches longer than  $\sim 100$   $\mu\text{m}$ . Branches shorter than this value (Fig.  
179 1d) showed minimal twist suggesting an axisymmetric organization of the cell wall, but a right-handed  
180 twist was observed at this stage in a small number of branches (less than 5 %). On the other hand,  
181 longer branches (Fig. 1e- g) always had a clear left-handed twist. The branches in early stages ( $< 100$   
182  $\mu\text{m}$  length) recovered their original shape after rehydration (Figs. 1h and i), which showed that the  
183 response was elastic and reversible. This behavior may indicate an efficient mechanism for shape  
184 recovery during/after acute water stress. The twist per unit length (see Supplemental Information)  
185 became a constant value of  $\sim 0.82$   $^\circ/\mu\text{m}$  (Fig. 1j) for branches longer than the transition length ( $\sim 100$

186  $\mu\text{m}$ ), indicating that the wall organization was uniform. The maximum amount of twist per unit of  
187 length (Fig. 1k) increased from  $\sim 0.6$   $^\circ/\mu\text{m}$  to  $\sim 1.2$   $^\circ/\mu\text{m}$  when the mean branch length was about 175  
188  $\mu\text{m}$  and then dropped to  $\sim 0.82$   $^\circ/\mu\text{m}$  for branches longer than 300  $\mu\text{m}$ .



189

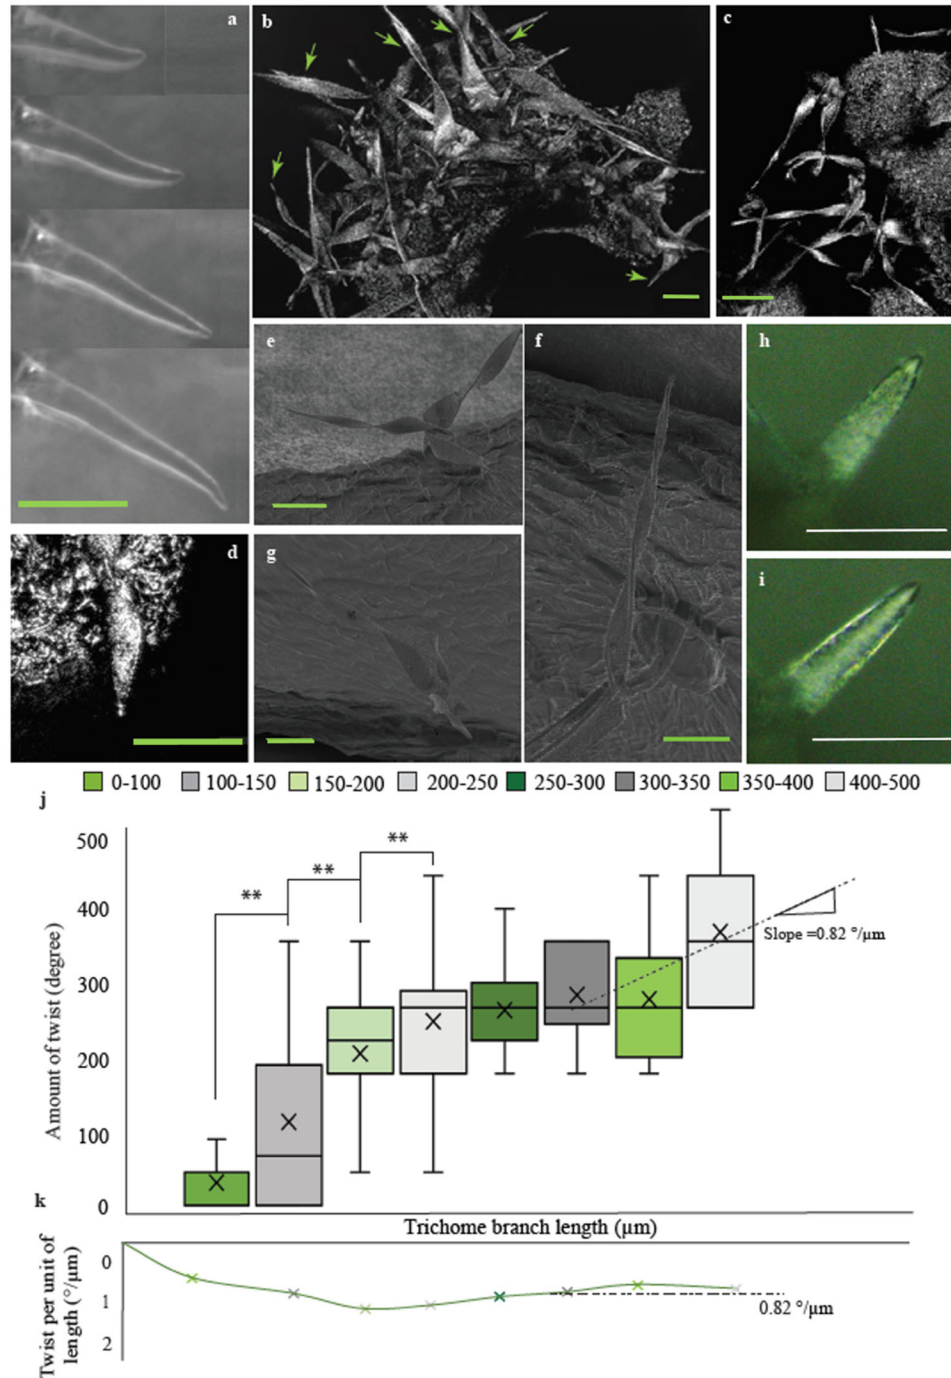

**Figure 1.** Twist of trichome branches during collapse after desiccation. (a) axisymmetric growth of leaf trichome branches (with permission from *Nature Plants* (13)). (b) and (c) are shows twisted trichome branches of *Arabidopsis* WT (Col) after desiccation. Arrows in (b) denote these ranches. (d) Right-handed twist of a short trichome branch observed in less than 5% of the branches and only when they were short. (e)-(g) Left-handed twist of trichome branch using SEM. (h) Trichome branch after dehydration. (i) The trichome branch in (h) after rehydration after ~2 hours in water, which shows that the collapse of branches is elastic and recoverable; plastic deformation is not observed in the dehydration process. (j) Amount of twist and (k) twist per unit of length of desiccated branches for each range of length (in  $^\circ$  and  $^\circ/\mu\text{m}$  respectively), from measurements of more than 220 trichome branches.  $**p < 0.01$ . Scale bars = 40  $\mu\text{m}$  in (a)-(i).



## 190 **Finite Element Model of a Trichome Branch**

191 A finite element (FE) model was used to estimate the mechanical properties that would lead to  
192 the observed twist behavior. Although direct measurements of plant pavement cells have been made  
193 using nanoindentation (20, 21), atomic force microscopy (31, 32), and other related devices (33), such  
194 approaches are challenging with trichome branches because of their location above the plane of the  
195 leaf. For this reason, the initial cell wall material properties for the model were based on direct  
196 measurements from pavement cells (13). The FE model was then used parametrically to identify the  
197 ranges of material properties and organization (i.e., elastic moduli, fiber orientation) that were plausible  
198 relative to the deformations observed. Although there is an inherent non-uniqueness to this analysis,  
199 overall behavior can be quantified. To find a plausible set of material properties, different combinations  
200 of properties were assumed, and the results were compared with the deformations observed in  
201 desiccated trichome branches. The loading conditions for the model were defined using the turgor  
202 pressure, which was increased to a maximum value and held constant for a consistent amount of time  
203 which allowed the viscoelastic branch wall to relax fully. Then, the turgor pressure was removed so  
204 that the external atmospheric pressure was the only remaining applied force which collapsed the branch.  
205 The relaxation process allows residual stresses to develop in the cell wall. In arteries (14, 15), the  
206 growth-induced residual stresses and material properties determine the opening angle of the orthotropic  
207 structure after a single cut is made. By analogy, residual stresses in the cell wall develop during growth  
208 as part of the expansion process and their status is revealed by the desiccation. The trichome branches  
209 undergo large deformations after desiccation such that a nonlinear solver for large deformation  
210 behavior was used in the FE model.

211 The cell wall includes many constituents such as cellulose microfibrils, pectin, hemicellulose,  
212 and different proteins (5, 34). Computational models of plant cells must account for these constituents  
213 in some way. Their length scale relative to the cell size dictates either high-resolution and massive  
214 computational models with limited scope or models based on material homogenization, such as those  
215 used here, that allow extensive parametric studies to be conducted. Thus, the trichome branch cell wall  
216 was simulated as a homogenized composite shell with mechanical properties derived from cellulose  
217 and pectin in which the orientation of cellulose fibers was allowed to vary with respect to position (Fig.  
218 2a; discussion of the sensitivity study is given in the Supporting Information). The properties of each  
219 element of the model were homogenized from the assumed composite organization to include both  
220 anisotropic and viscoelastic behavior. The axis of the transverse anisotropy,  $\hat{\mathbf{n}}$ , was defined such that  
221  $90^\circ$  denoted alignment with the branch geometric symmetry axis and  $0^\circ$  with the radial direction. The

222 viscoelastic properties, representative of the pectin-rich matrix, defined the time-dependent behavior of  
223 the cell wall (21). Cell wall thickness plays an essential role in the overall trend concerning the twist  
224 along the length of the trichome (Fig. 2b). Previous measurements (13) showed the presence of a  
225 thickness gradient from the tip towards the base, but those measurements focused on the early stages  
226 of growth and cell shape patterning. If a thickness gradient was used over the entire branch length, the  
227 FE models showed that the twist behavior was attenuated toward the base (Fig. 2b) suggesting a uniform  
228 thickness in longer branches along the majority of the length away from the tip (see Supporting  
229 Information). The layered, composite organization used here could include any number of layers and  
230 organization (Fig. 2a). We focused on a 3-layer composite to represent the ‘average’ wall behavior to  
231 simplify the quantification relative to the measurements. In this way, the trends with respect to length  
232 could be observed (Figs. 2c, d). As expected, the amount and direction of branch twist depended upon  
233 fiber orientation, whether left-handed or right-handed (Fig. 2d), with similar stress patterns. Based on  
234 the twist data, longer trichomes must have a higher percentage of fibers aligned more closely with the  
235 growth axis than shorter trichomes. However, if all fibers were oriented parallel with the geometric  
236 symmetry axis of the branch (axial direction), the model predicted wall collapse without twist (Fig. 2e),  
237 i.e., an axisymmetric collapse. Thus, the observed twist cannot be explained using fibers aligned only  
238 with the direction transverse to the geometric symmetry axis (circumferential) or aligned with it (axial).

239

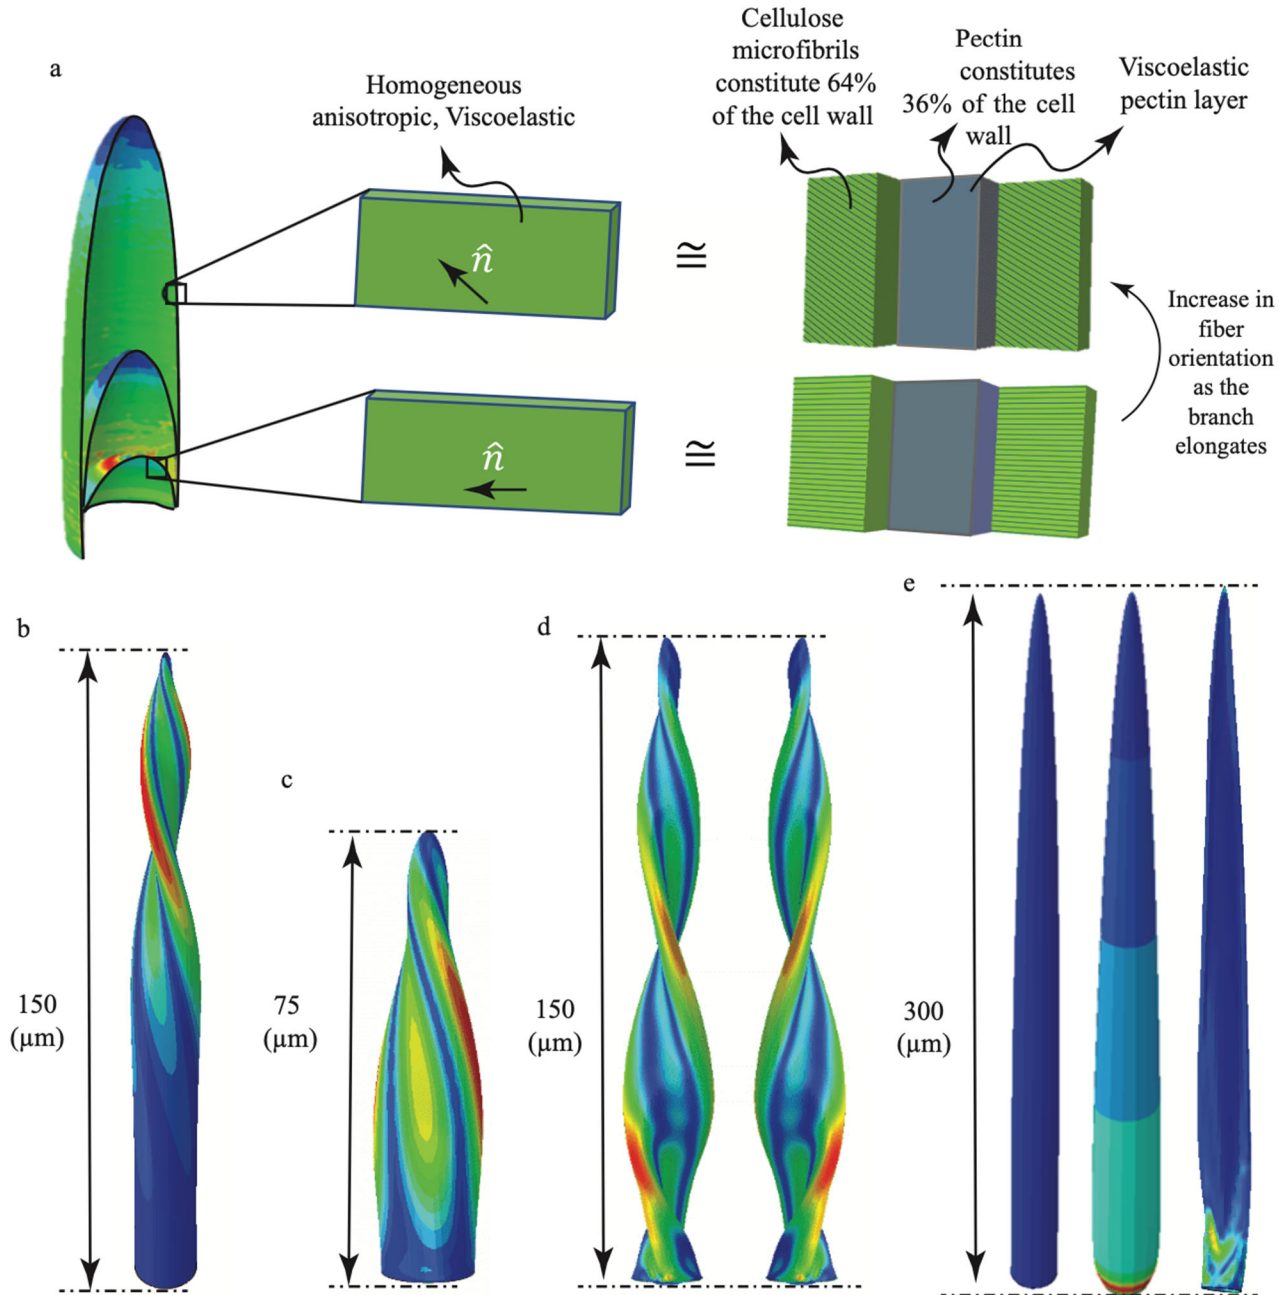

**Figure 2.** Finite element model of a trichome branch. (a) The organization of the cell wall is modeled as a composite shell of orthotropic and viscoelastic layers to represent the cellulose and pectin components, respectively, for different branch length. The composite of orthotropic and viscoelastic material is equivalent to a homogeneous anisotropic and viscoelastic material which is not available in FE software. (b) Effect of the thickness profile on branch twist; if the cell wall thickness increases continuously from the tip to the base the twist is confined to the tip only; a constant thickness of 200 nm for positions more than 50 nm from the tip leads to the same twist observed in experiments. (c) and (d) Cell wall von Mises stress of trichome branch model after removal of turgor pressure for branch length of 75 and 150  $\mu\text{m}$  with dominant angle of -30 and -45 and 45-degrees, respectively. Effect of right-handed fiber orientation on the direction of twist is shown in (d). (e) FEM of trichome branch with all longitudinal fibers without pressure (left), swelled under constant pressure without any longitudinal strain (middle) and star-shaped collapse after removing the pressure (right).

## 240 **Microtubule Handedness is Consistent with Twist**

241           The handedness of the twist of longer branches was clearly biased in the left-hand direction  
242 and highlighted the asymmetry in the cell wall that must be present. The angle of microtubule  
243 orientation can be used as an additional validation of the model because cortical microtubules (CMTs)  
244 and cellulose synthase (CESA) complexes are highly correlated in trichome branches (13). Live-cell  
245 microtubule (MT) imaging of entire branches (Fig. 3a-d) revealed clear patterns of cellular scale  
246 cortical microtubule organization. As previously reported (35), shorter branches had more transversely-  
247 aligned MTs while the orientation showed a directionality for longer branches. A bias toward left-  
248 handed asymmetry in trichome branch MT networks had been reported (36), but those measurements  
249 were limited with respect to trichome branch length and the fraction of the branch surface that was  
250 analyzed. We conducted high-resolution live-cell imaging of the cortical microtubule network of half  
251 of the branch cortex along its full length by tiling the individual images (Fig. 3a). The microtubule array  
252 usually had a consistent organization along the branch length, and mean MT orientation was quantified  
253 as a function of branch length. Figures 3e-f show a distinct change in organization from transverse in  
254 cells less than  $\sim 100 \mu\text{m}$  to left-handed helical. Clearly, the MT patterning as a pathway for CMF  
255 synthesis exhibits a bias that matches the branch twist behavior that is dominated towards the left-  
256 handed direction. The consistency of trichome twist direction and handedness of MTs showed a  
257 preferred asymmetry for branch wall organization similar to the crystal texture of other systems in  
258 nature, such as giant barnacle shells (37).

259

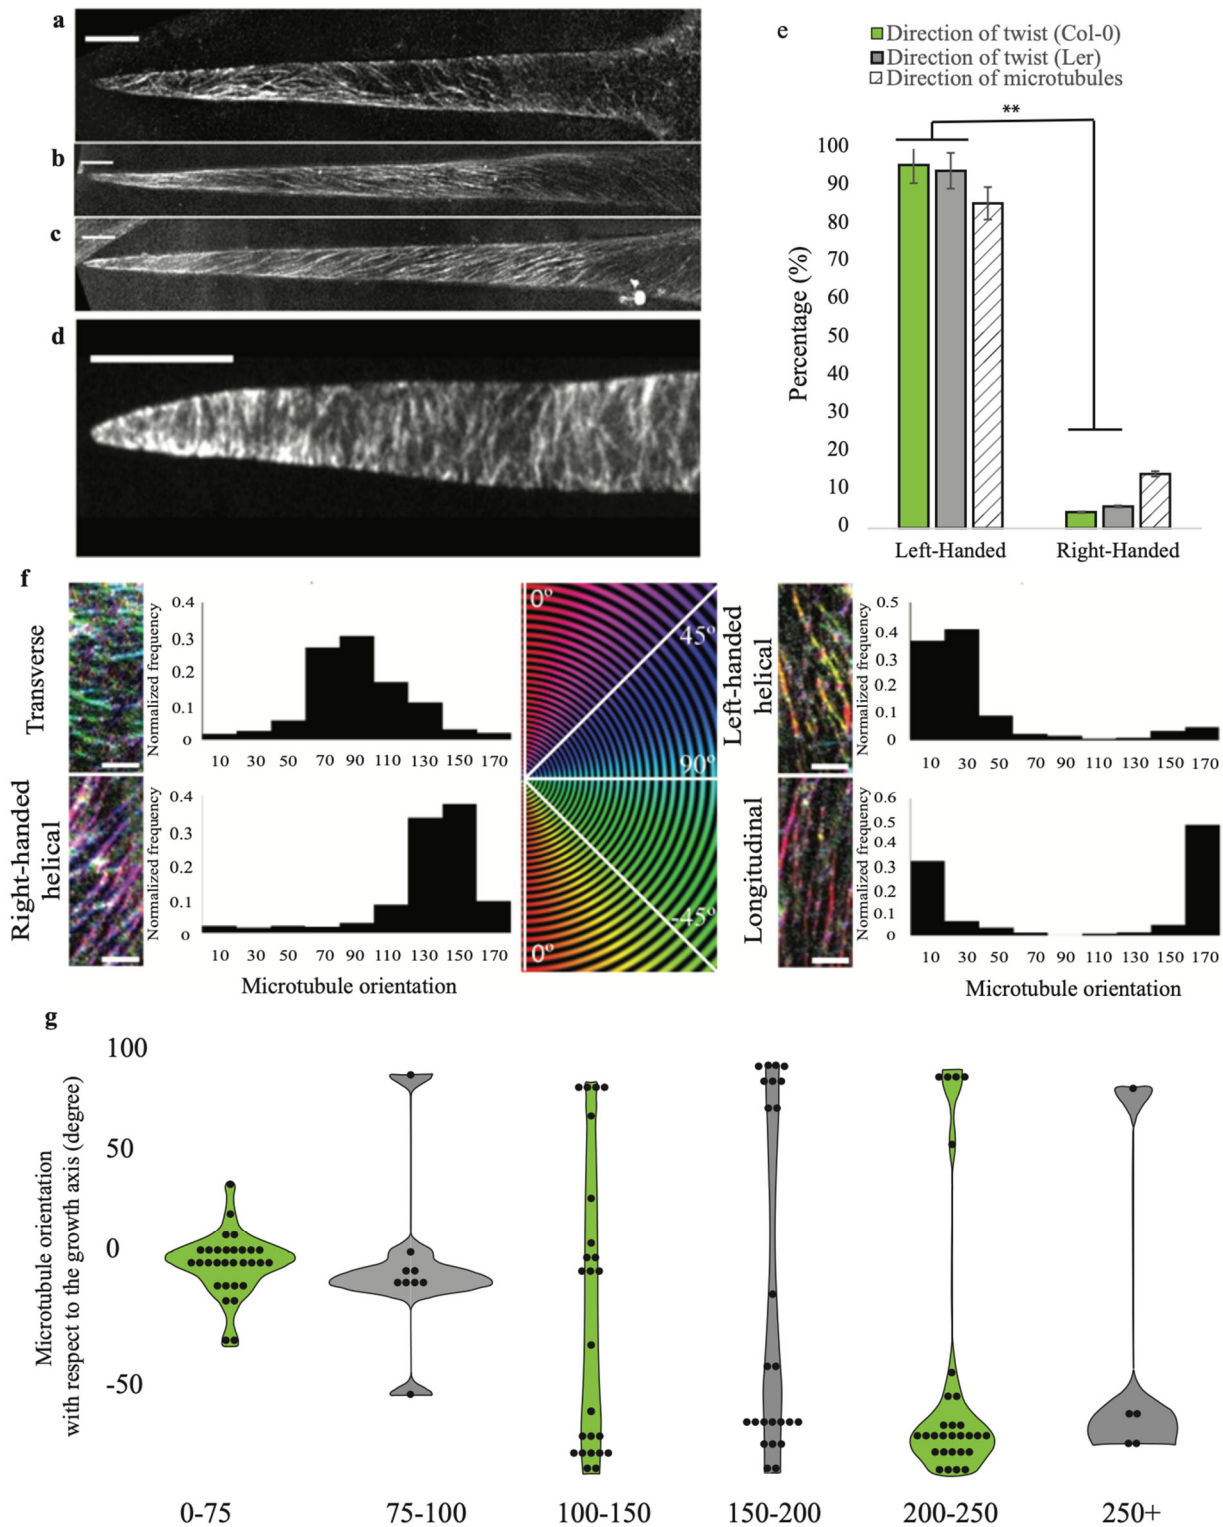

**Figure 3.** Microtubule alignment and degree of handedness at different stages of growth. (a)-(d) Cortical microtubules at the plasma membrane aligned in, right-handed direction (a), longitudinal direction (b), left-handed direction (c) and transverse direction (d). (e) Comparison of the handedness twist of desiccated branches in Col-0, Ler and microtubule orientation measurements. \*\* $P < 0.01$ . (f) Qualitative categorization of global alignment of branches. (g) Dominant angle of the MT alignment relative to the primary growth axis. 13

## 260 **Branch Stiffness and Natural Frequency**

261 During branch growth, the newly synthesized CMFs change direction. The overall organization  
262 will affect the axial stiffness of the branch, defined as a weighted average of the material stiffness in  
263 the growth direction over the cross-sectional area of the wall (calculations provided in Supporting  
264 Information). Fig. 4 shows the computed axial stiffness as a function of branch length for the Col  
265 trichome branches based on the models that matched the twist data. The stiffness initially decreases as  
266 a function of branch length due to the dominance of transverse CMFs and corresponding lack of twist  
267 in desiccated branches. In longer branches, the axial stiffness increases because the CMFs are aligned  
268 more closely with the growth axis. The material displacement and stress at the base of the branch will  
269 be affected by the axial stiffness (i.e., higher stiffness will lead to lower displacement for the same  
270 turgor pressure). Growth stops after the computed axial stiffness approaches the critical value of  $\sim 110$   
271 N/m (symbol indicated with an A in Fig. 4).

272 The mechanism for the change in CMF orientation observed after the transition length of  $100$   
273  $\mu\text{m}$  was examined using the model. An axisymmetric organization of CMFs in the wall, whether  
274 transverse to the geometric symmetry axis or aligned with it, would result in wall stresses that also  
275 reflect this axisymmetry. In other words, the principal stresses would align with the axial and transverse  
276 directions during the early stages of growth. Such an axisymmetric wall stress or strain could not induce  
277 an asymmetric CMF synthesis, nor could cause a passive realignment of existing CMFs. However, as  
278 the branch extends beyond a threshold value, the length itself could provide a mechanism to break the  
279 symmetry. The axial stiffness of the branch (Supporting Information) scales linearly with the axial  
280 modulus and inversely with length ( $\sim L^{-1}$ ). The bending stiffness also scales linearly with axial modulus,  
281 but inversely with the *cube* of the length ( $\sim L^{-3}$ ). In other words, as the branch grows with constant  
282 properties defined by the transverse CMF alignment, it becomes more susceptible to bending motion  
283 that would shift the direction of maximum principal stress in the cell wall and break the symmetry. This  
284 shift, in turn, could influence CMTs and the angle of cellulose fiber synthesis. Results from the Col FE  
285 model (solid green line in Fig. 4), based on an assumption of only transverse CMFs, show the trend for  
286 both axial stiffness and bending stiffness with respect to branch length. The model predicts that a branch  
287 of length  $\sim 100 \mu\text{m}$  would have a bending stiffness of  $\sim 0.08$  N/m (symbol indicated with B in Fig. 4).  
288 Remarkably, models created to match the measured twist data predict a bending stiffness for longer  
289 branches that plateau to a constant value. Ambient environmental variations, such as thermal noise,  
290 could strongly influence such a compliant structure. A similar type of thermal noise is often exploited  
291 to calibrate atomic force microscope (AFM) cantilevers (38) that can be much stiffer ( $\sim 40$  N/m), but



292 more resonant. The estimated bending displacements of 10s to 100s of nanometers would be enhanced  
 293 at the branch tip as tapering occurs due to the reduced cross-section. After the synthesis of oriented  
 294 CMFs is initiated, the subsequent growth would never return to the condition of axisymmetric synthesis,  
 295 and the principal stresses would remain unaligned with the geometric symmetry axis. At subsequent  
 296 stages of growth, the shear stress could also cause some degree of passive reorientation of CMFs (11).

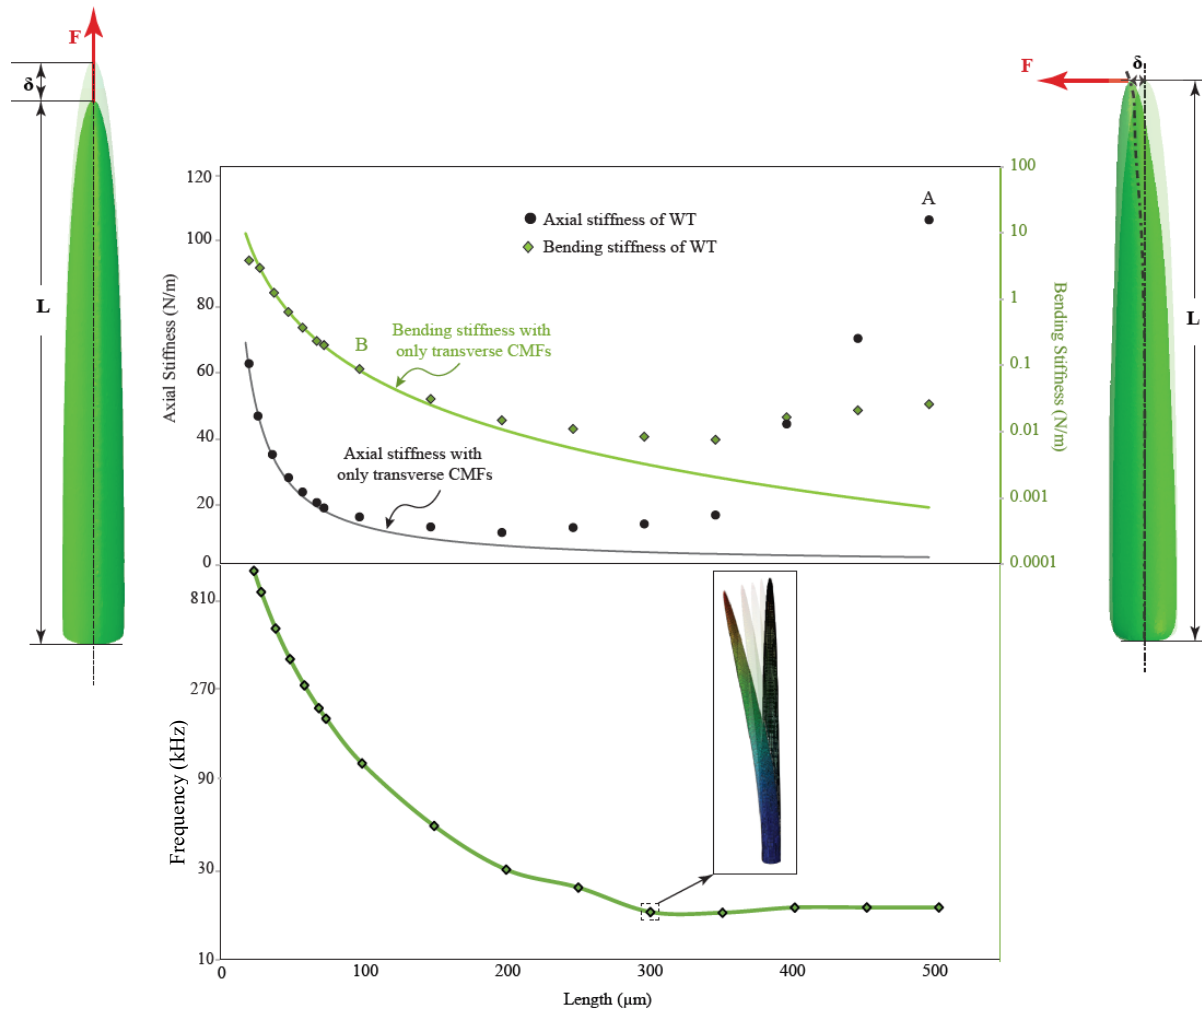

**Figure 4.** Influence of cellulose microfibril (CMF) orientation on bending stiffness and axial stiffness and natural frequency of the first mode. Predicted axial and bending stiffness of trichome branches with different lengths based on model values needed to match twist data. Axial stiffness (see Supplemental Information) converges to about 100 N/m at point A, which suggests that growth stops when the value of axial stiffness is reached. Bending stiffness for WT trichome branches shows an initial reduction but then a stabilization as a function of length. After a length of about 100 μm, when the bending stiffness reaches the minimum possible value, the CMF deposition is no longer transverse to the growth axis which stabilizes the influence of bending even for longer branches. Lowest frequency at which deformation occurs (first mode) after the length of ~300 μm converges to ~20 kHz with the change of branch length and cell wall material properties.



297 Finally, the first natural frequency of trichome branch bending was calculated based on the  
298 model values that matched the twist behavior (Fig. 4). The results show a convergence to a constant  
299 value of  $\sim 20$  kHz as the branch reaches the length of  $\sim 300$   $\mu\text{m}$ . The vibration frequencies of leaf  
300 trichomes have been shown to correlate with protection of the leaves against insects such as caterpillars  
301 (16, 17). Here, the branch bending frequency converges to a value within the frequency band of several  
302 insects including caterpillars (16, 17), crickets (39), katydid (40) and cicadas (41).

### 303 **Conclusion**

304 In this article, we have presented a predictive computational model that replicates the  
305 mechanical twist of desiccated trichome branches to provide insight into the organization of  
306 constituents within the branch cell wall that change during growth. The observed behavior cannot be  
307 the result of CMT reorientation or changes due to cell wall decomposition during the desiccation  
308 process because the twist was present even for rapid desiccation. The presence of an asymmetric  
309 organization is hidden by the axisymmetric geometry of the pressurized branch. The FE model was  
310 used to quantify the observations of the branch twist that revealed the changes that occurred during  
311 growth, and the MT imaging validated the wall organization necessary for twist. These observations do  
312 not support strong passive realignment of CMFs, although it may be present to some extent after the  
313 transition point of  $\sim 100$   $\mu\text{m}$  at which time CMF synthesis asymmetry initiates. Shorter branches have  
314 only transversely oriented CMFs and such an organization would have principal stresses aligned with  
315 the axial and transverse directions. The length of the transition of CMF orientation corresponds with a  
316 predicted branch bending stiffness, based on models that match the measured twist, would allow  
317 ambient noise of the plant and environment to induce bending displacements of the branch. A  
318 combination of a bending motion and the disappearance of tip-localized cytoskeletal regulators (13, 42)  
319 may explain the length associated with the symmetry-breaking event that dramatically alters the CMF  
320 synthesis pattern. The degree of twist and direction of twist are controlled by cytoskeletal (43) and cell  
321 wall biosynthesis (44) systems that have poorly understood effects on cell wall patterning and  
322 morphogenesis. The approach described here provides a reliable strategy to integrate cell growth and  
323 desiccation phenotypes with biomechanics and their genetic control.

324 The results presented also suggest a limit to the hypothesis regarding passive reorientation. The  
325 multinet growth hypothesis suggests that cell wall elongation or expansion modifies the organization  
326 of CMFs that are exposed to shear stress in the cell, potentially resulting in passive reorientation  
327 toward the growth direction (11, 32). For a longitudinal strain of 14 %, the average orientation of  
328 wall polymer chains of onion was observed to rotate along the stretch direction by  $\sim 5.3^\circ$  (45).

329 However, this tilt and realignment of CMFs have not been observed in all cell types. For example,  
330 live-cell imaging of *Arabidopsis* was used to analyze cellulose reorientation during root cell growth  
331 in WT seedlings (46). No evidence of reorientation was detected in a mutant, *procuste1-1* (*prc1-1*)  
332 with a partial defect in cellulose synthesis. Complete reorientation of all microfibrils to the symmetry  
333 direction would not support the twist measured here. After the left-handed deposition initiates,  
334 additional elongation of the branch would be accompanied by some reorientation of CMFs, which  
335 would enhance the axial stiffness of the branch. This behavior is thought to decrease the net growth  
336 rate of the cell, and eventually cease the growth process (46). By observing the growth of the WT  
337 *Arabidopsis* trichome branch, it is clear that the growth rate is almost constant during the first 50  $\mu\text{m}$ .  
338 This rate increases for some periods of growth but never decreases (13). Thus, passive realignment  
339 cannot be the only control of the observed CMF orientation. Analysis of helical growth from  
340 *Arabidopsis* mutants such as the *tor2* or *tor2 zwichel* double mutant indicates that microtubules play a  
341 significant role in the helical phenotype of leaf trichomes (47). *Arabidopsis* mutants growing with a  
342 right-handed twist have been reported to have cortical microtubules that are oriented around the cell in  
343 left-handed helices and vice versa (48). The relationship between MTs and the direction of cell growth  
344 is usually explained by assuming that MTs control the deposition of load-bearing cellulose microfibrils  
345 of the cell wall, so the cells elongate or expand in a direction perpendicular to the deposited cellulose  
346 (13). Furutani et al. (47) used this model to explain helical growth in spiral mutants for which expansion  
347 perpendicular to cellulose fibers that are synthesized in a left-handed direction would result in right-  
348 handed growth and vice versa. Others explain the behavior as a helix that unwraps in the direction  
349 opposite to the direction of stretch so that a wall generated with a left-handed helical pitch would  
350 unwind with a right-handed twist as the cell elongates (49). The results here suggest that the helical  
351 growth observed in mutant trichome branches (50) cannot be the result of MT handedness alone  
352 because the handedness of synthesis in the WT gives rise to a straight branch.

353 Our results firmly establish that removal of turgor pressure can reveal salient information about  
354 cell wall composition, which can improve the interpretation of genetic and environmental effects on  
355 plant growth. Desiccation of cells has been used by others recently (51) to test hypotheses about changes  
356 in cell wall organization during growth. They showed that dehydration of cotyledons led to wrinkling  
357 of the periclinal cell walls while anticlinal walls were affected much less. If more accurate information  
358 about cell wall mechanical properties can be determined by means of desiccation, imaging, and  
359 computational models during growth, then more accurate predictions can be made regarding overall  
360 static and dynamic behavior. Previous models of trichome vibrations (16, 17), predicted frequencies  
361 above the range of many insects (Libersat et al., 1994; Pollack and Imaizumi, 1999; Bennet-Clark and

362 Young, 1994), but those models were based on a thicker cell wall (1.5-6  $\mu\text{m}$ ) (52), isotropic properties,  
363 and lower cell wall stiffness (0.6-4.7 GPa) (53, 54). They also assumed that the properties were constant  
364 during growth. Our results based on the twist observations as a function of growth show that the  
365 frequencies would plateau when the branch reaches full maturity with a frequency closer to that of  
366 insects. Further research and multiscale models are needed to understand the role of mechanical stress  
367 on individual cell wall constituents to predict growth mechanics more accurately.

### 368 **Supporting Information**

369 Supporting Information available on-line.

370 Supporting figures: Figure S1, Figure S2, Figure S3, Figure S4, Figure S5, Figure S6

371 Supporting tables: Table S1. Table S2.

372 Supporting animations: Movie.S1.

### 373 **Acknowledgments**

374 We thank to the Purdue Life Science Microscopy Facility for their expert assistance. Thanks to the  
375 Nano-Engineering Research Core Facility (NERCF) for their high-performance microscopy and we  
376 acknowledge the Holland Computing Center (HCC). Both NERCF and HCC are supported in part  
377 by the Nebraska Research Initiative. This research was supported by NSF Grant No. IOS-1715444  
378 to D.B.S. and J.A.T. The authors declare no conflict of interest.

### 379 **Author Contributions**

380 All authors participated in the experimental design, data collection, data analysis and manuscript  
381 preparation. J.A.T. conceived the project. J.A.T. and S.K. developed the finite element models. S.K.  
382 conducted the branch imaging and data processing. T.D. performed the MT measurements.

383

### **References**

- 384 1. Somerville, C. 2006. Cellulose Synthesis in Higher Plants. *Annu. Rev. Cell Dev. Biol.* 22:53–  
385 78.
- 386 2. Fujita, M., R. Himmelspach, J. Ward, A. Whittington, N. Hasenbein, C. Liu, T.T. Truong,  
387 M.E. Galway, S.D. Mansfield, C.H. Hocart, and G.O. Wasteneys. 2013. The anisotropy1  
388 D604N Mutation in the Arabidopsis Cellulose Synthase1 Catalytic Domain Reduces Cell Wall

- 389 Crystallinity and the Velocity of Cellulose. *Plant Physiol.* 162:74 LP – 85.
- 390 3. Paredez, A.R., C.R. Somerville, and D. Ehrhardt. 2006. Visualization of Cellulose Synthase  
391 with Microtubules. *Science (80- )*. 312:1491–1495.
- 392 4. Geitmann, A., and J.K.E. Ortega. 2009. Mechanics and modeling of plant cell growth. *Trends*  
393 *Plant Sci.* 14:467–478.
- 394 5. Cosgrove, D.J. 1999. Enzymes and other agents that enhance cell wall extensibility. *Annu.*  
395 *Rev. Plant Physiol. Plant Mol. Biol.* 50:391–417.
- 396 6. Baskin, T.I. 2005. Anisotropic Expansion of the Plant Cell Wall. *Annu. Rev. Cell Dev. Biol.*  
397 21:203–222.
- 398 7. McFarlane, H.E., A. Döring, and S. Persson. 2014. The Cell Biology of Cellulose Synthesis.  
399 *Annu. Rev. Plant Biol.* 65:69–94.
- 400 8. Adoutte, A., and H. Le Guyader. 1993. The cytoskeletal basis of plant growth and form. *Plant*  
401 *Sci.* 88:125.
- 402 9. Hamant, O., M.G. Heisler, H. Jönsson, P. Krupinski, M. Uyttewaal, P. Bokov, F. Corson, P.  
403 Sahlin, A. Boudaoud, E.M. Meyerowitz, Y. Couder, and J. Traas. 2008. Developmental  
404 Patterning by Mechanical Signals in Arabidopsis. *Science (80- )*. 322:1650 LP – 1655.
- 405 10. Fischer, K., and P. Schopfer. 1997. Interaction of auxin, light, and mechanical stress in  
406 orienting microtubules in relation to tropic curvature in the epidermis of maize coleoptiles.  
407 *Protoplasma.* 196:108–116.
- 408 11. Green, P.B. 1960. Multinet Growth in the Cell Wall of Nitella. *J. Biophys. Biochem. Cytol.*  
409 7:289–296.
- 410 12. Preston, R.D. 1982. The case for multinet growth in growing walls of plant cells. *Planta.*  
411 155:356–363.
- 412 13. Yanagisawa, M., A.S. Desyatova, S.A. Belteton, E.L. Mallery, J.A. Turner, and D.B.  
413 Szymanski. 2015. Patterning mechanisms of cytoskeletal and cell wall systems during leaf  
414 trichome morphogenesis. *Nat. Plants.* 1:15014.

- 415 14. Alford, P.W., J.D. Humphrey, and L.A. Taber. 2008. Growth and remodeling in a thick-walled  
416 artery model: effects of spatial variations in wall constituents. *Biomech. Model. Mechanobiol.*  
417 7:245–262.
- 418 15. Holzapfel, G.A., T.C. Gasser, and R.W. Ogden. 2000. A New Constitutive Framework for  
419 Arterial Wall Mechanics and a Comparative Study of Material Models. *J. Elast. Phys. Sci.*  
420 *solids.* 61:1–48.
- 421 16. Liu, S., J. Jiao, T.J. Lu, F. Xu, B.G. Pickard, and G.M. Genin. 2017. Arabidopsis Leaf  
422 Trichomes as Acoustic Antennae. *Biophys. J.* 113:2068–2076.
- 423 17. Yin, J., H. Liu, J. Jiao, X. Peng, B.G. Pickard, G.M. Genin, T.J. Lu, and S. Liu. 2021.  
424 Ensembles of the leaf trichomes of Arabidopsis thaliana selectively vibrate in the frequency  
425 range of its primary insect herbivore. *Extrem. Mech. Lett.* 101377.
- 426 18. Szymanski, D., and C.J. Staiger. 2018. The Actin Cytoskeleton: Functional Arrays for  
427 Cytoplasmic Organization and Cell Shape Control. *Plant Physiol.* 176:106 LP – 118.
- 428 19. Yu, Y., S. Wu, J. Nowak, G. Wang, L. Han, Z. Feng, A. Mendrinna, Y. Ma, H. Wang, X.  
429 Zhang, J. Tian, L. Dong, Z. Nikoloski, S. Persson, and Z. Kong. 2019. Live-cell imaging of  
430 the cytoskeleton in elongating cotton fibres. *Nat. Plants.* 5:498–504.
- 431 20. Forouzesh, E., A. Goel, S.A. Mackenzie, and J.A. Turner. 2013. In vivo extraction of  
432 Arabidopsis cell turgor pressure using nanoindentation in conjunction with finite element  
433 modeling. *Plant J.* 73:509–520.
- 434 21. Hayot, C.M., E. Forouzesh, A. Goel, Z. Avramova, and J.A. Turner. 2012. Viscoelastic  
435 properties of cell walls of single living plant cells determined by dynamic nanoindentation. *J.*  
436 *Exp. Bot.* 63:2525–2540.
- 437 22. Zsivanovits, G., A.J. MacDougall, A.C. Smith, and S.G. Ring. 2004. Material properties of  
438 concentrated pectin networks. *Carbohydr. Res.* 339:1317–1322.
- 439 23. Cintrón, M.S., G.P. Johnson, and A.D. French. 2011. Young’s modulus calculations for  
440 cellulose I $\beta$  by MM3 and quantum mechanics. *Cellulose.* 18:505–516.
- 441 24. Diddens, I., B. Murphy, M. Krisch, and M. Müller. 2008. Anisotropic elastic properties of

- 442 cellulose measured using inelastic X-ray scattering. *Macromolecules*. 41:9755–9759.
- 443 25. Mariano, M., N. El Kissi, and A. Dufresne. 2014. Cellulose nanocrystals and related  
444 nanocomposites: Review of some properties and challenges. *J. Polym. Sci. Part B Polym.*  
445 *Phys.* 52:791–806.
- 446 26. Eichhorn, Y.R.J. 2001. The young's modulus of a microcrystalline cellulose. *Cellulose*.  
447 8:197–207.
- 448 27. Guimarães, G.C., M.C. Coelho Júnior, and E.E. Garcia Rojas. 2009. Density and Kinematic  
449 Viscosity of Pectin Aqueous Solution. *J. Chem. Eng. Data*. 54:662–667.
- 450 28. Taiz, L., and E. Zeiger. 2006. Cell Walls: Structure, Biogenesis and Expansion. *Plant Physiol*.  
451 313–338.
- 452 29. Wayne, R., and M.P. Staves. 1991. The density of the cell sap and endoplasm of nitellopsis  
453 and chara. *Plant Cell Physiol*. 32:1137–1144.
- 454 30. Gibson, L.J. 2012. The hierarchical structure and mechanics of plant materials. *J. R. Soc.*  
455 *Interface*. 9:2749–2766.
- 456 31. Marga, F., M. Grandbois, D.J. Cosgrove, and T.I. Baskin. 2005. Cell wall extension results in  
457 the coordinate separation of parallel microfibrils: evidence from scanning electron microscopy  
458 and atomic force microscopy. *Plant J*. 43:181–190.
- 459 32. Zhang, T., D. Vavylonis, D.M. Durachko, and D.J. Cosgrove. 2017. Nanoscale movements of  
460 cellulose microfibrils in primary cell walls. *Nat. Plants*. 3:17056.
- 461 33. Sugimoto, K., R.E. Williamson, and G.O. Wasteneys. 2002. New Techniques Enable  
462 Comparative Analysis of Microtubule Orientation, Wall Texture, and Growth Rate in Intact  
463 Roots of Arabidopsis. *Plant Physiol*. 124:1493–1506.
- 464 34. Burton, R.A., M.J. Gidley, and G.B. Fincher. 2010. Heterogeneity in the chemistry, structure  
465 and function of plant cell walls. *Nat. Chem. Biol*. 6:724–732.
- 466 35. Folkers, U., V. Kirik, U. Schöbinger, S. Falk, S. Krishnakumar, M.A. Pollock, D.G.  
467 Oppenheimer, I. Day, A.R. Reddy, G. Jürgens, and M. Hülskamp. 2002. The cell

- 468 morphogenesis gene *ANGUSTIFOLIA* encodes a CtBP/BARS-like protein and is involved in  
469 the control of the microtubule cytoskeleton. *EMBO J.* 21:1280–1288.
- 470 36. Sambade, A., K. Findlay, C.W. Lloyd, and H. Buschmann. 2014. Actin-Dependent and -  
471 Independent Functions of Cortical Microtubules in the Differentiation of Arabidopsis Leaf  
472 Trichomes. 26:1629–1644.
- 473 37. Rodríguez-Navarro, A.B., C. CabraldeMelo, N. Batista, N. Morimoto, P. Alvarez-Lloret, M.  
474 Ortega-Huertas, V.M. Fuenzalida, J.I. Arias, J.P. Wiff, and J.L. Arias. 2006. Microstructure  
475 and crystallographic-texture of giant barnacle (*Austromegabalanus psittacus*) shell. *J. Struct.*  
476 *Biol.* 156:355–362.
- 477 38. Sader, J.E., J.W.M. Chon, and P. Mulvaney. 1999. Calibration of rectangular atomic force  
478 microscope cantilevers. *Rev. Sci. Instrum.* 70:3967–3969.
- 479 39. Libersat, F., J.A. Murray, and R.R. Hoy. 1994. Frequency as a releaser in the courtship song of  
480 two crickets, *Gryllus bimaculatus* (de Geer) and *Teleogryllus oceanicus*: a neuroethological  
481 analysis. *J. Comp. Physiol. A.* 174:485–494.
- 482 40. Pollack, G.S., and K. Imaizumi. 1999. Neural analysis of sound frequency in insects.  
483 *BioEssays.* 21:295–303.
- 484 41. Bennet-Clark, H., and D. Young. 1994. The scaling of song frequency in cicadas. *J. Exp. Biol.*  
485 191:291–294.
- 486 42. Yanagisawa, M., J.M. Alonso, and D.B. Szymanski. 2018. Microtubule-Dependent  
487 Confinement of a Cell Signaling and Actin Polymerization Control Module Regulates  
488 Polarized Cell Growth. *Curr. Biol.* 28:2459-2466.e4.
- 489 43. Ishida, T., Y. Kaneko, M. Iwano, and T. Hashimoto. 2007. Helical microtubule arrays in a  
490 collection of twisting tubulin mutants of *Arabidopsis thaliana*. *Proc. Natl. Acad. Sci. U. S. A.*  
491 104:8544–8549.
- 492 44. Saffer, A.M., N.C. Carpita, and V.F. Irish. 2017. Rhamnose-Containing Cell Wall Polymers  
493 Suppress Helical Plant Growth Independently of Microtubule Orientation. *Curr. Biol.*  
494 27:2248-2259.e4.



- 495 45. Kafle, K., Y. Bum Park, C.M. Lee, J.J. Stapleton, S.N. Kiemle, D.J. Cosgrove, and S.H. Kim.  
496 2017. Effects of mechanical stretching on average orientation of cellulose and pectin in onion  
497 epidermis cell wall: A polarized FT-IR study. *Cellulose*. 24:3145–3154.
- 498 46. Anderson, C.T., A. Carroll, L. Akhmetova, and C. Somerville. 2010. Real-Time Imaging of  
499 Cellulose Reorientation during Cell Wall Expansion in Arabidopsis Roots. *Plant Physiol*.  
500 152:787–796.
- 501 47. Furutani, I., Y. Watanabe, R. Prieto, M. Masukawa, K. Suzuki, K. Naoi, S. Thitamadee, T.  
502 Shikanai, and T. Hashimoto. 2000. The SPIRAL genes are required for directional control of  
503 cell elongation in Arabidopsis thaliana. *Development*. 127:4443 LP – 4453.
- 504 48. Yuen, C.Y.L., R.S. Pearlman, L. Silo-suh, P. Hilson, K.L. Carroll, and P.H. Masson. 2003.  
505 WVD2 and WDL1 Modulate Helical Organ Growth and Anisotropic Cell Expansion in  
506 Arabidopsis. *Plant Physiol*. 131:493 LP – 506.
- 507 49. Lloyd, C., and J. Chan. 2002. Helical Microtubule Arrays and Spiral Growth. *Plant Cell*.  
508 14:2319 LP – 2324.
- 509 50. Buschmann, H., M. Hauptmann, D. Niessing, C.W. Lloyd, and A.R. Schäffner. 2009. Helical  
510 Growth of the Arabidopsis Mutant *tortifolia2* Does Not Depend on Cell Division Patterns but  
511 Involves Handed Twisting of Isolated Cells. *Plant Cell*. 21:2090 LP – 2106.
- 512 51. Haas, K.T., R. Wightman, E.M. Meyerowitz, and A. Peaucelle. 2020. Pectin  
513 homogalacturonan nanofilament expansion drives morphogenesis in plant epidermal cells.  
514 *Science (80-. )*. 367:1003 LP – 1007.
- 515 52. Zhou, L.H., S.B. Liu, P.F. Wang, T.J. Lu, F. Xu, G.M. Genin, and B.G. Pickard. 2017. The  
516 Arabidopsis trichome is an active mechanosensory switch. *Plant. Cell Environ*. 40:611–621.
- 517 53. Gibson, L.J. 2012. The hierarchical structure and mechanics of plant materials. *J. R. Soc.*  
518 *Interface*. 9:2749–2766.
- 519 54. Probine, M.C., and R.D. Preston. 1962. Cell Growth and the Structure and Mechanical  
520 Properties of the Wall in Internodal Cells of *Nitella opaca*: II. MECHANICAL PROPERTIES  
521 OF THE WALLS. *J. Exp. Bot*. 13:111–127.

522

### Supporting References

- 523 55. Chafe, S.C., and A.B. Wardrop. 2004. Fine structural observations on the epidermis. *Planta*.  
524 109:39–48.
- 525 56. Dyson, R.J., and O.E. Jensen. 2010. A fibre-reinforced fluid model of anisotropic plant cell  
526 growth. *J. Fluid Mech.* 655:472–503.

527
